# Supplementary material
Source: PubMed Central journal article supplement (PMC6043393)
Supplement: NIHMS974156-supplement-supplement_1.pdf [file NIHMS974156-supplement-supplement_1.pdf]

**Electronic Supplementary Material**  
**Assessing Response to Therapy Using Simultaneous PET/MRI in**  
**Preclinical Model of Pancreatic Cancer**

**Journal: Molecular Imaging and Biology**

Joshua M. Goldenberg,<sup>1,2</sup> Julio Cárdenas-Rodríguez,<sup>3,4</sup> Mark D. Pagel<sup>2</sup>

*1. Department of Pharmaceutical Sciences, The University of Arizona, Tucson, AZ, 85721, USA*

*2. Department of Cancer Systems Imaging, The University of Texas M.D. Anderson Cancer Center, Houston, TX, 77054, USA*

*3. Department of Medical Imaging, The University of Arizona, Tucson, AZ*

*4. University of Arizona Cancer Center, The University of Arizona, Tucson, AZ, 85719, USA*

**Corresponding Author:**

Mark D. Pagel

MD Anderson Cancer Center

3SCR4.3642, Unit 1907

Houston, TX 77054-1901

Tel: (713)-205-8515

Email.: [mdpapel@mdanderson.org](mailto:mdpapel@mdanderson.org)

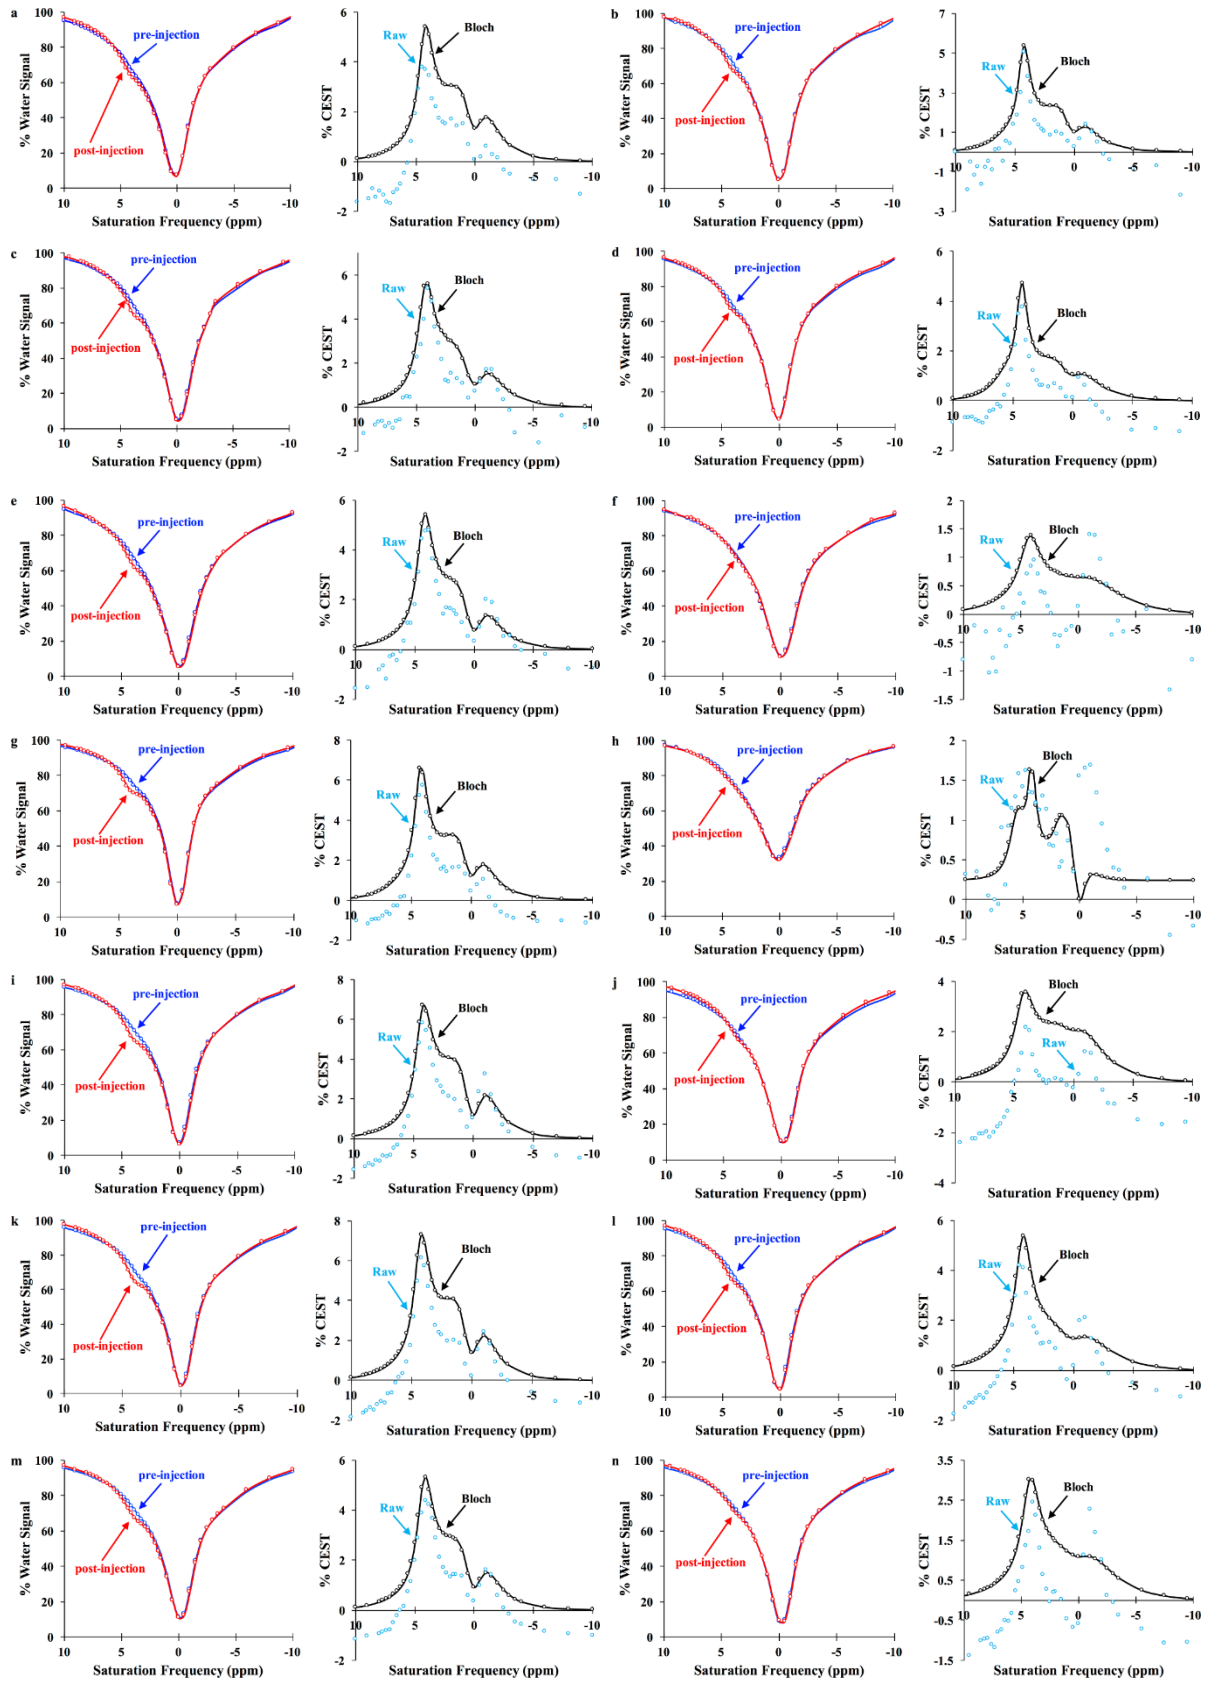

**Supplemental Figure 1. *In vivo* CEST spectra one day before treatment.** Each post-injection spectrum showed lower % water signal than the pre-injection spectrum at 4.2 and 5.6 ppm. The difference between pre-injection and post-injection CEST spectra (blue circles) were fit with the Bloch-McConnell equations modified for chemical exchange (black line). a,c,e,g,i,k,m: Spectra are shown for vehicle-treated mice. b,d,f,h,j,l,n: Spectra are shown for metformin-treated mice.

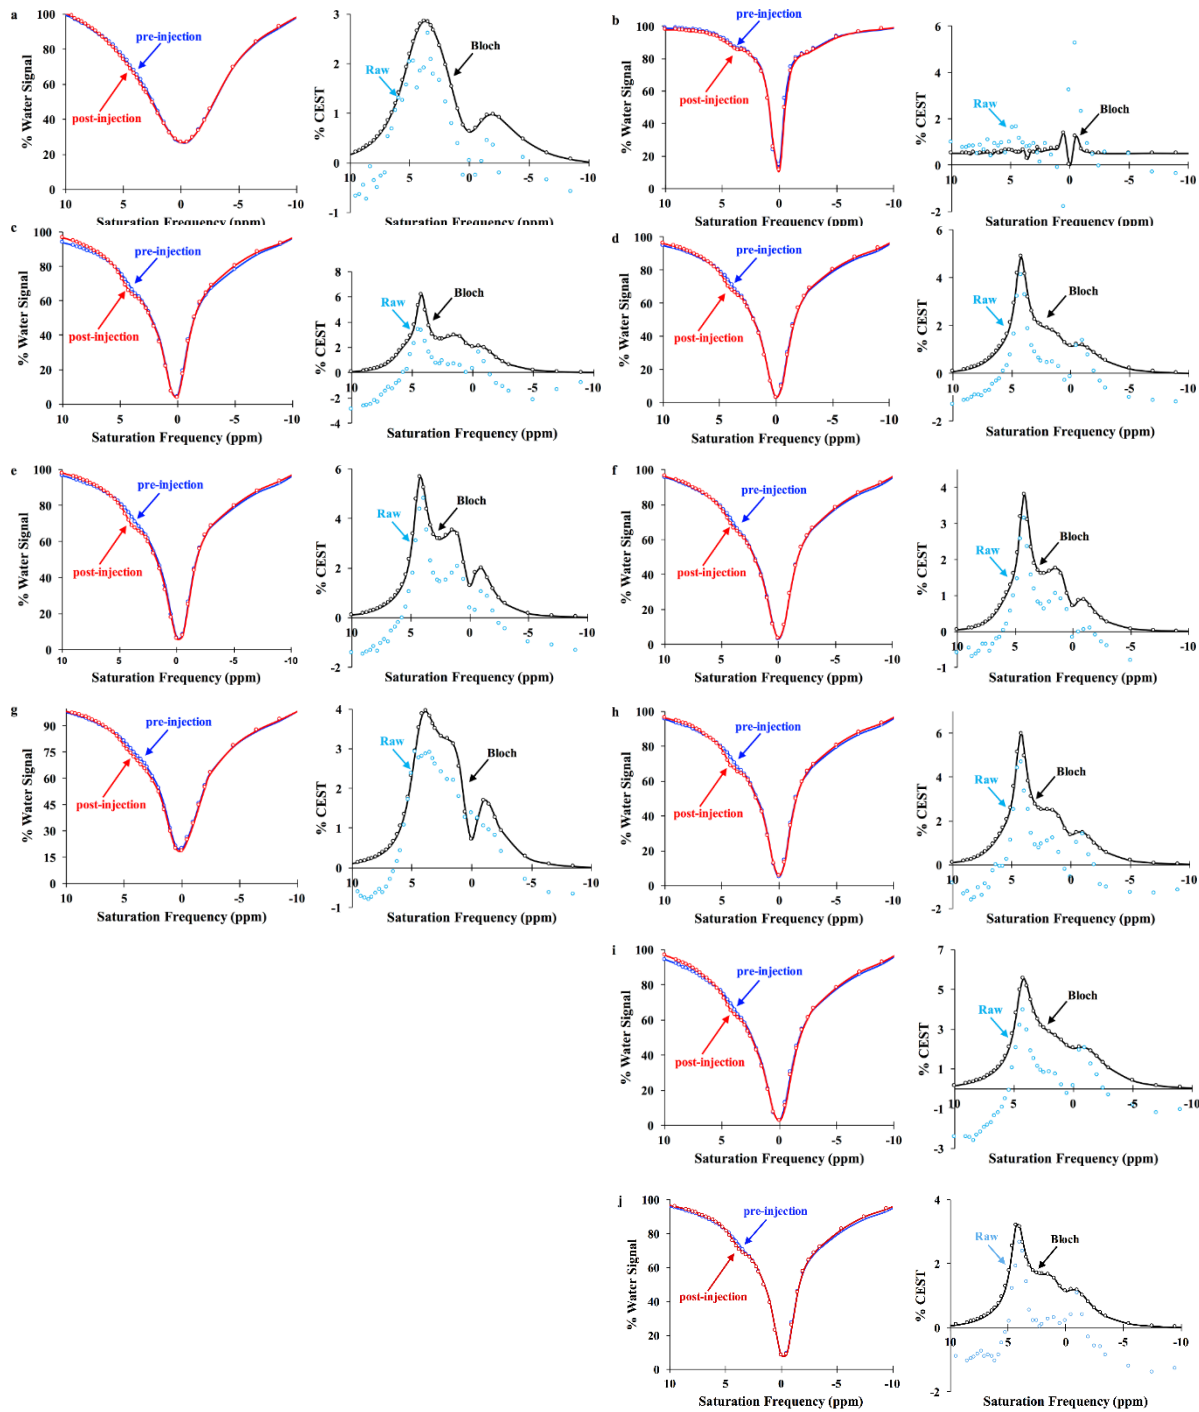

**Supplemental Figure 2. *In vivo* CEST spectra one day after treatment.** Each post-injection spectrum showed lower % water signal than the pre-injection spectrum at 4.2 and 5.6 ppm. The difference between pre-injection and post-injection CEST spectra (blue circles) were fit with the Bloch-McConnell equations modified for chemical exchange (black line). a,c,e,g: Spectra are shown for vehicle-treated mice. b,d,f,h,i,j: Spectra are shown for metformin-treated mice.

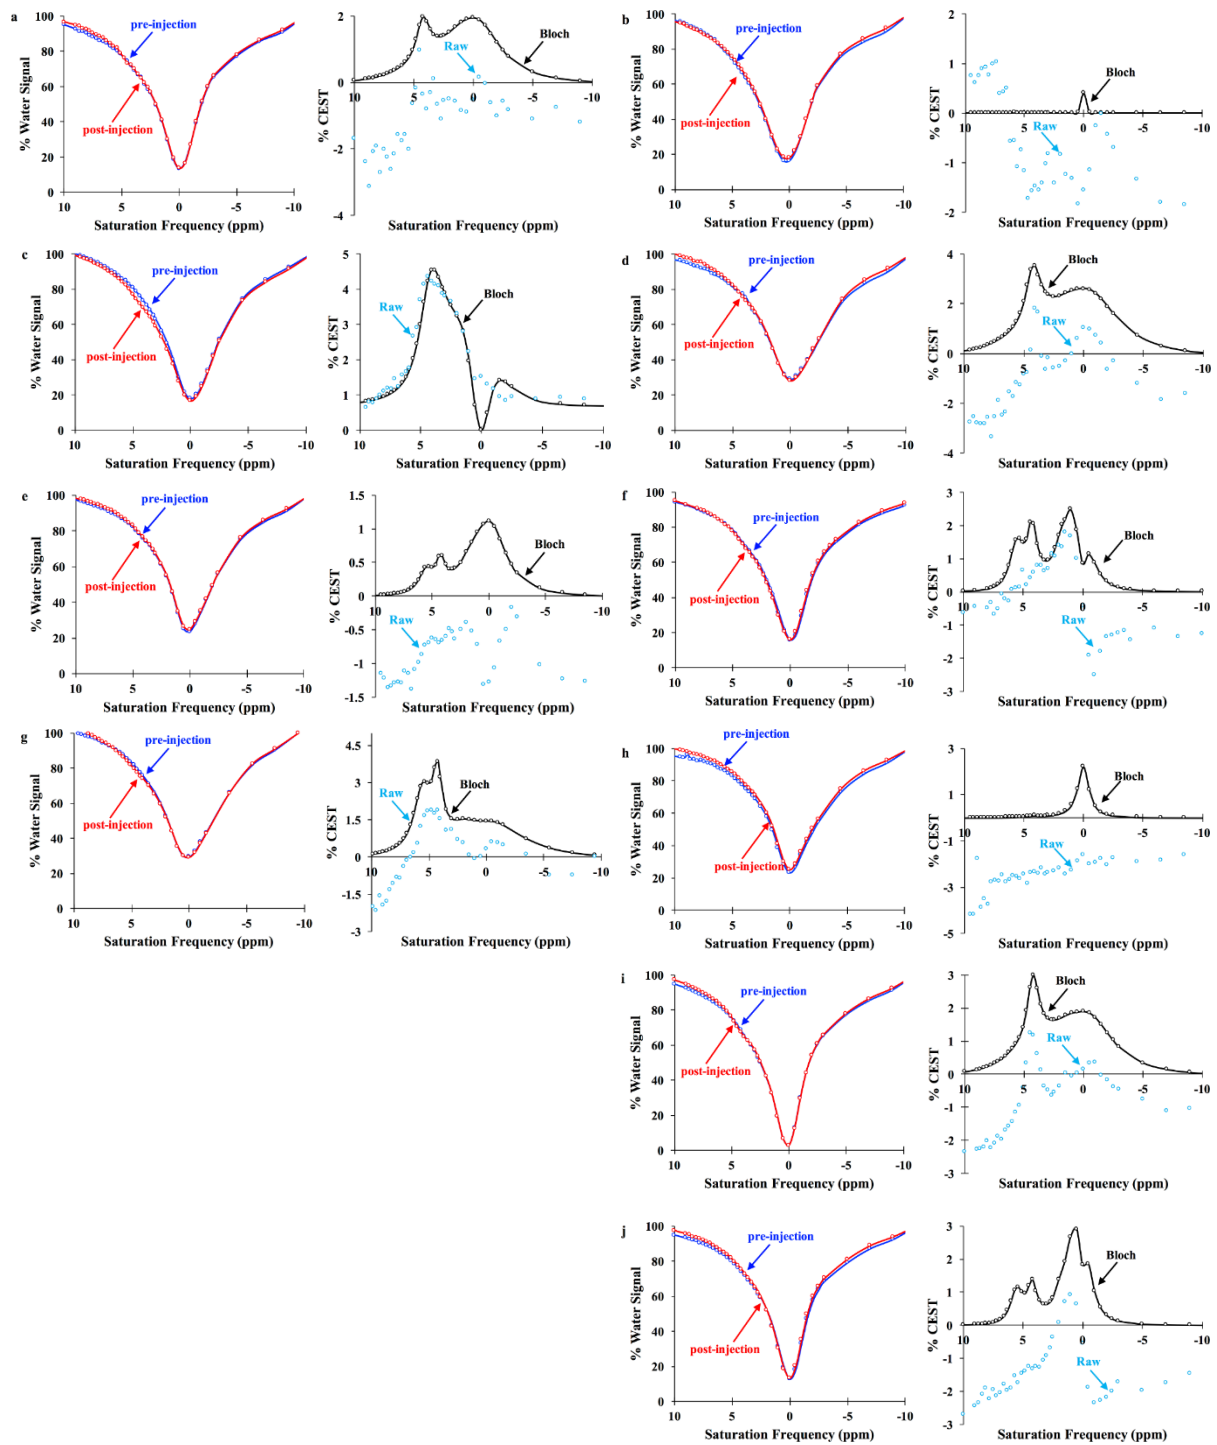

**Supplemental Figure 3. *In vivo* CEST spectra seven days after treatment.** Each post-injection spectrum showed lower % water signal than the pre-injection spectrum at 4.2 and 5.6 ppm. The difference between pre-injection and post-injection CEST spectra (blue circles) were fit with the Bloch-McConnell equations modified for chemical exchange (black line). a,c,e,g: Spectra are shown for vehicle-treated mice. b,d,f,h,i,j: Spectra are shown for metformin-treated mice.

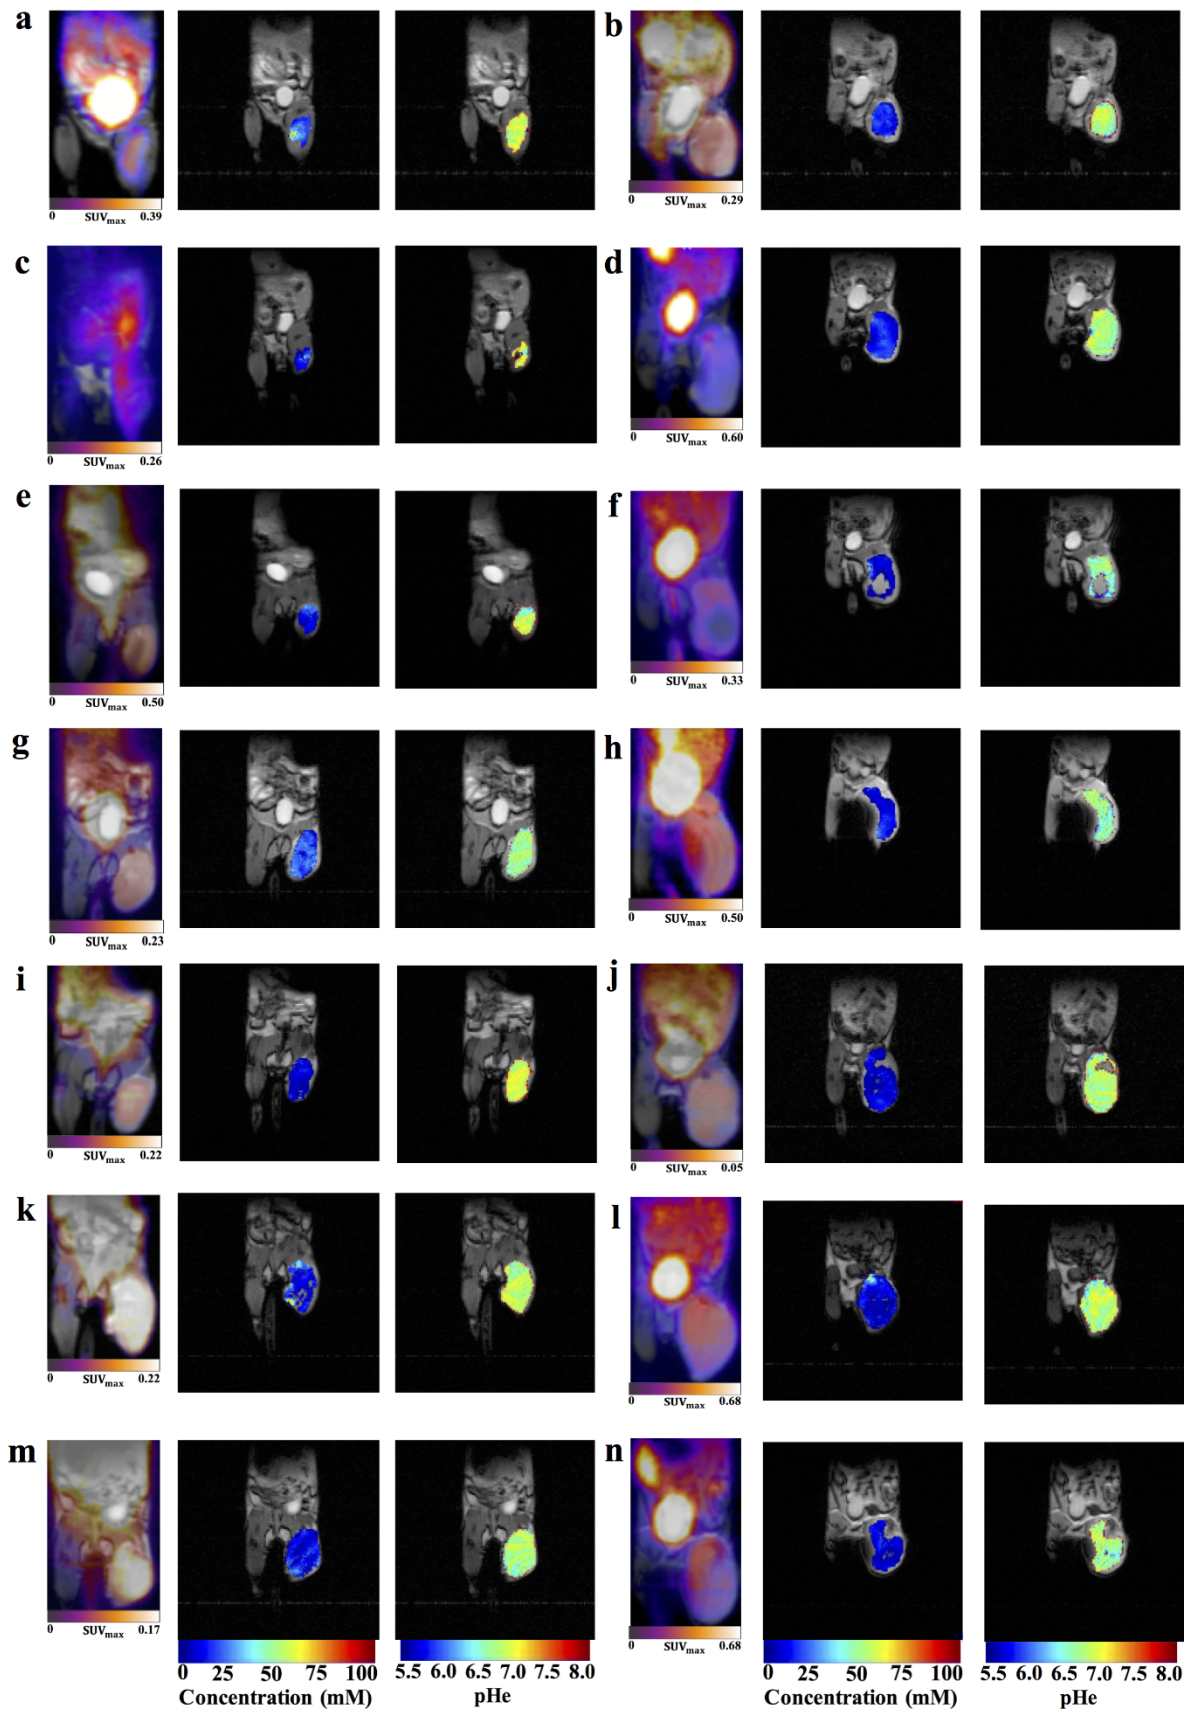



**Supplemental Figure 4.** Images of  $SUV_{max}$  representing [ $^{18}F$ ]DG uptake, concentration representing iopamidol uptake, and pHe representing acidosis for mice imaged on Day -1. a,c,e,g,i,k,m: Images are shown for vehicle-treated mice. b,d,f,h,j,l,n: Images are shown for metformin-treated mice.

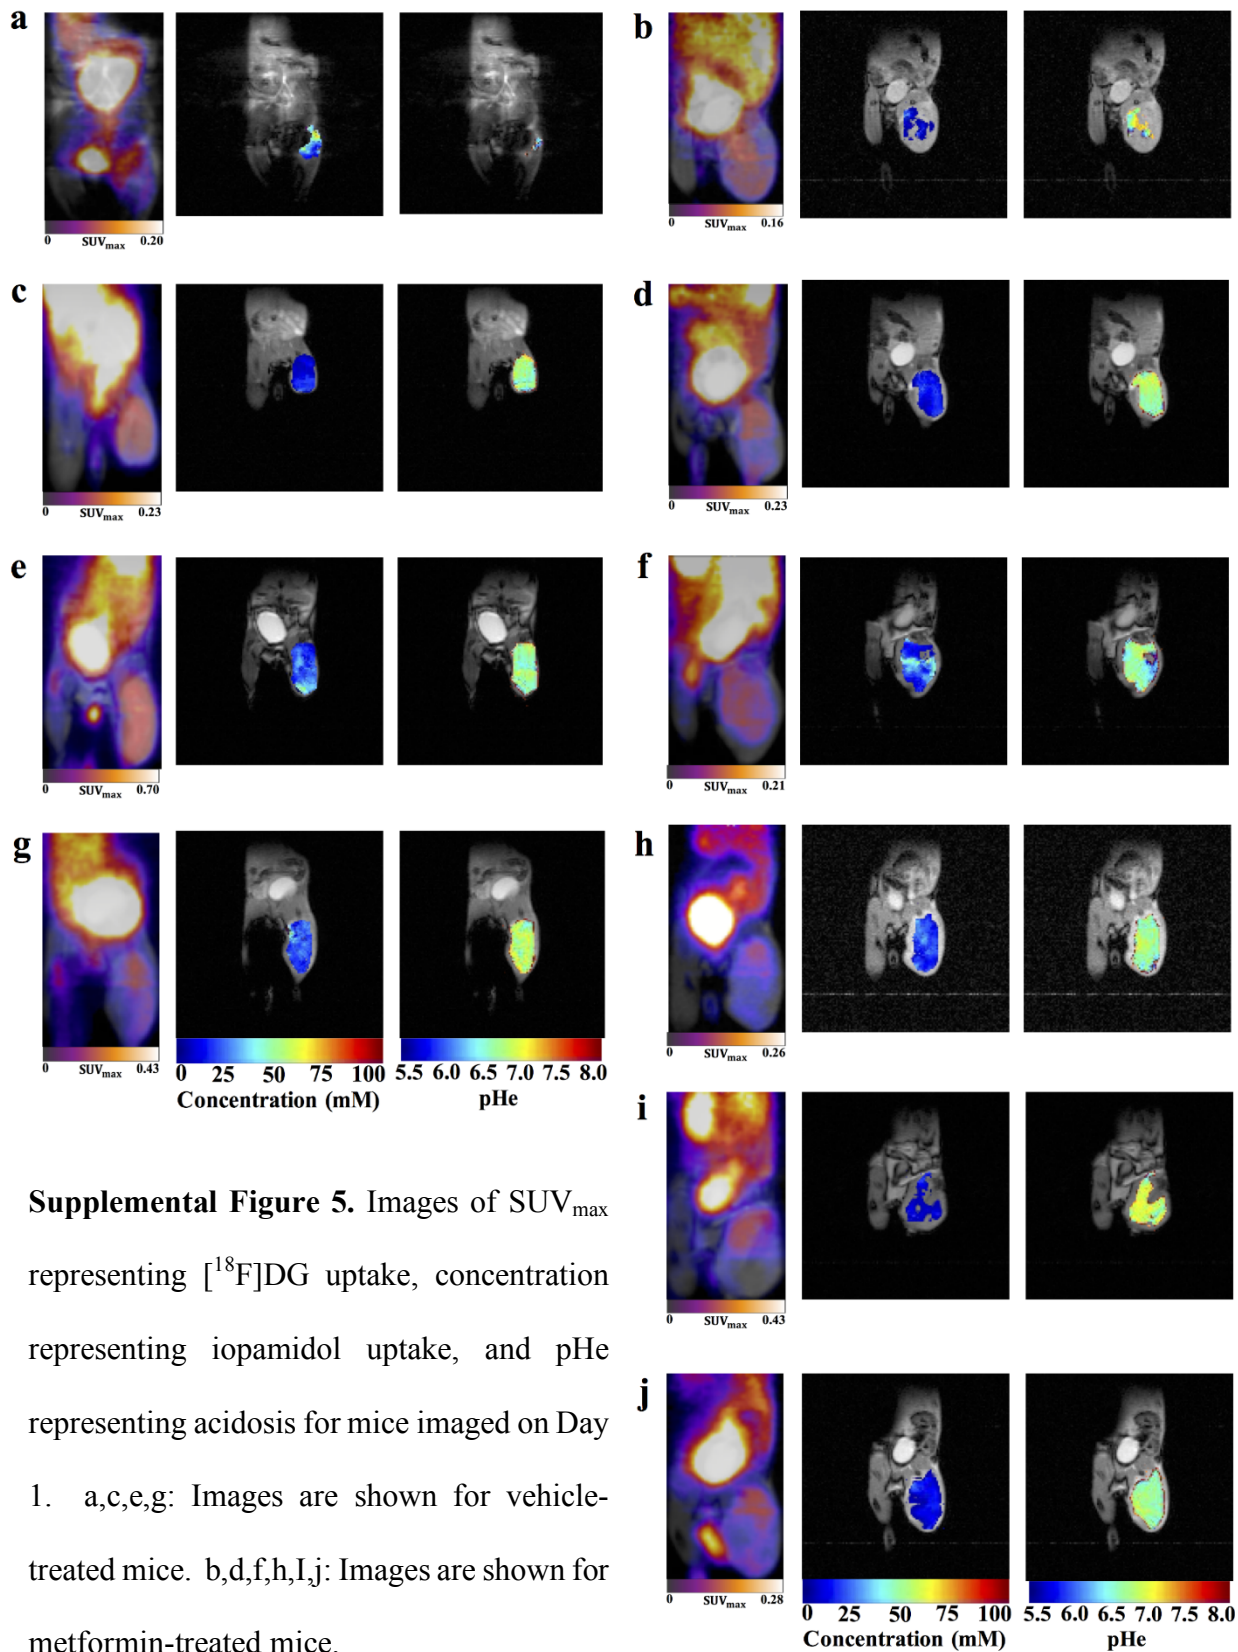

**Supplemental Figure 5.** Images of SUV<sub>max</sub> representing [<sup>18</sup>F]DG uptake, concentration representing iopamidol uptake, and pHe representing acidosis for mice imaged on Day 1. a,c,e,g: Images are shown for vehicle-treated mice. b,d,f,h,i,j: Images are shown for metformin-treated mice.

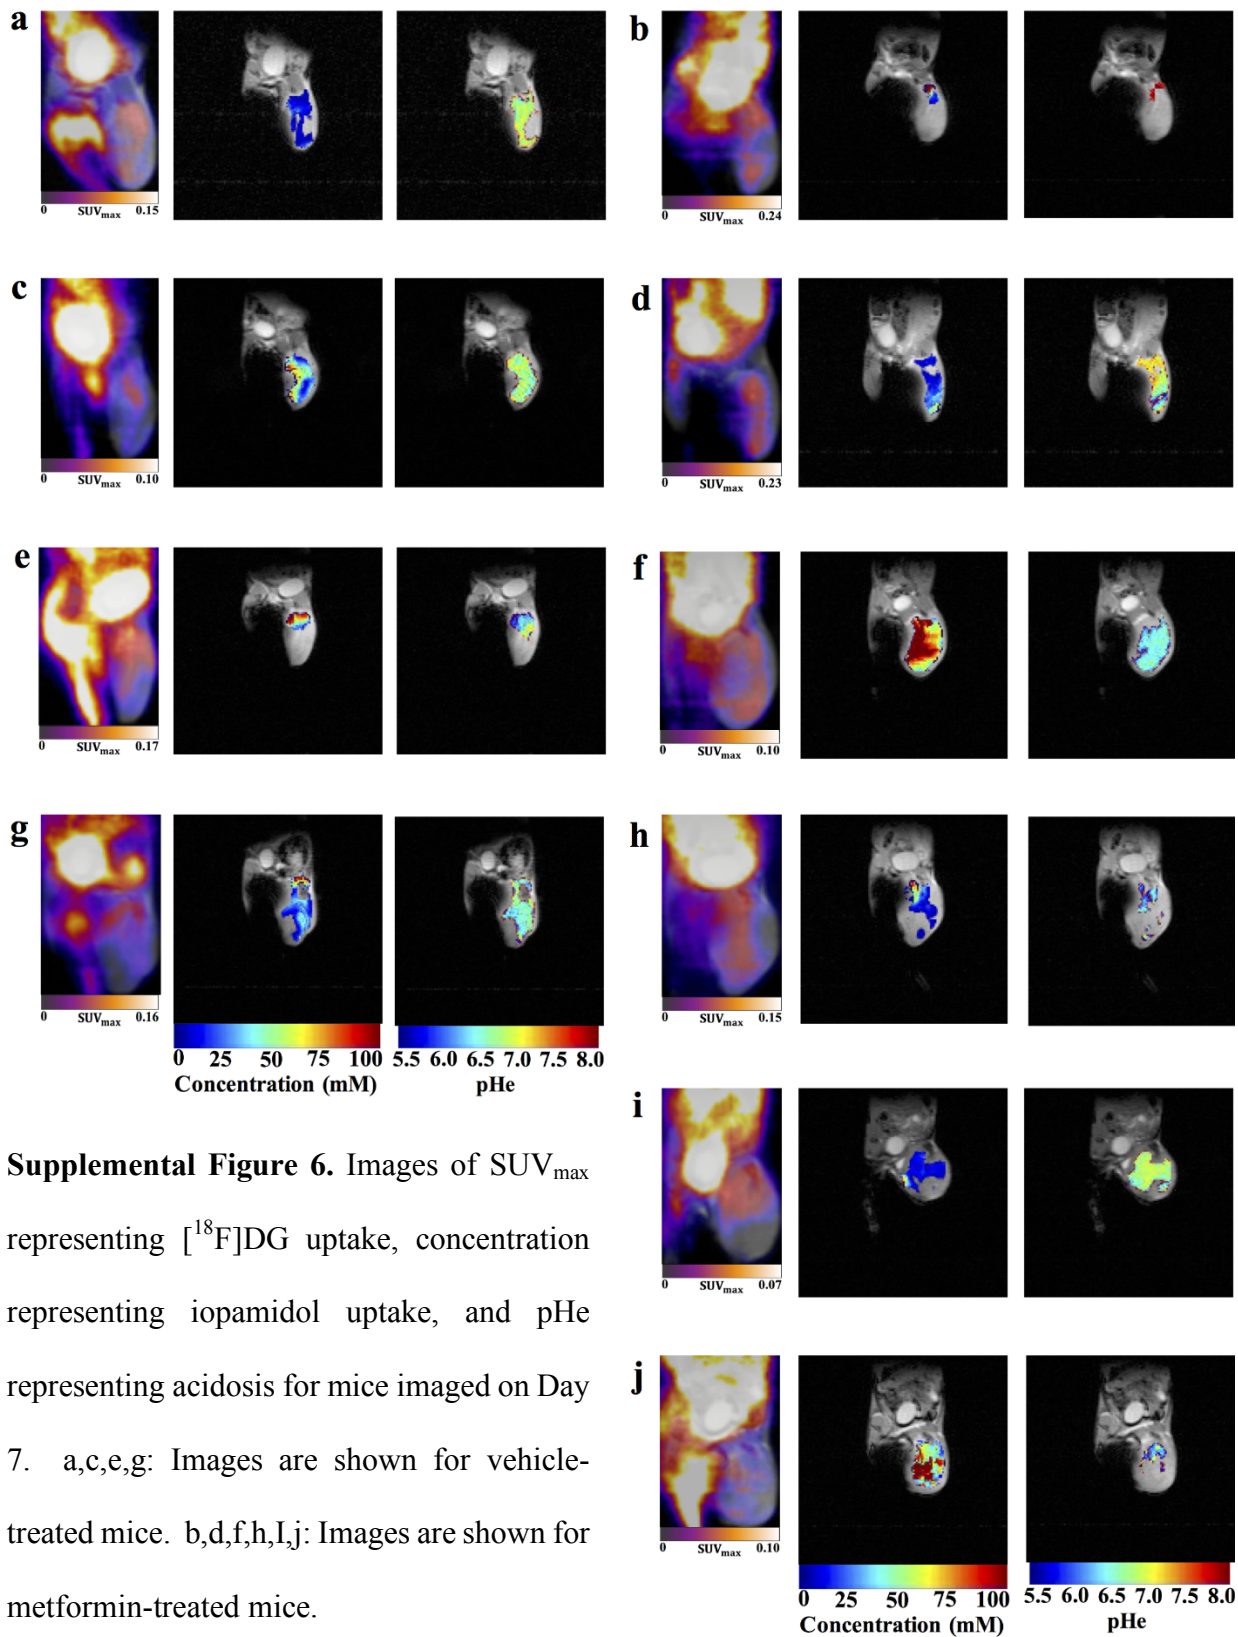

**Supplemental Table 1.** p-Scores for vehicle-treated (untreated) and metformin-treated (treated) mice using both a One Sample Student's t-test, and a Two-Sample Hotelling's T<sup>2</sup> Distribution test.

| <b>Day -1 vs Day 1</b>                          | <b>Untreated</b> | <b>Treated</b>  | <b>Treated vs Untreated</b> |
|-------------------------------------------------|------------------|-----------------|-----------------------------|
| <b>Change in pHe</b>                            | -0.12            | 0.09            | 0.23                        |
| <b>t-test p-value</b>                           | 0.059            | 0.35            | 0.07                        |
| <b>Change in mean Suv<sub>max</sub></b>         | 0.10             | -0.24           | -0.25                       |
| <b>t-test p-value</b>                           | 0.45             | 0.07            | 0.17                        |
| <b>Change in mean pHe/Suv<sub>max</sub></b>     | (-0.12 , 0.10)   | (0.09 , -0.24)  | (0.23 , -0.26)              |
| <b>Hotelling's T<sup>2</sup> t-test p-value</b> | 0.15             | 0.16            | <b>0.03</b>                 |
| <b>Day -1 vs Day 7</b>                          | <b>Untreated</b> | <b>Treated</b>  | <b>Treated vs Untreated</b> |
| <b>Change in pHe</b>                            | -0.33            | -0.53           | -0.18                       |
| <b>t-test p-value</b>                           | 0.10             | <b>0.05</b>     | 0.48                        |
| <b>Change in mean Suv<sub>max</sub></b>         | -0.14            | -0.35           | -0.12                       |
| <b>t-test p-value</b>                           | <b>0.02</b>      | <b>0.02</b>     | 0.39                        |
| <b>Change in mean pHe/Suv<sub>max</sub></b>     | (-0.33 , -0.14)  | (-0.53 , -0.35) | (-0.184 , -0.12)            |
| <b>Hotelling's T<sup>2</sup> t-test p-value</b> | <b>0.03</b>      | <b>0.01</b>     | <b>0.007</b>                |
